# Supplementary material for: The effect of n-3 polyunsaturated fatty acid supplementation on cognitive function outcomes in the elderly depends on the baseline omega-3 index
Source: Royal Society of Chemistry journal article supplement (doi:10.1039/d3fo02959j), 2023-01-01
Supplement: d3fo02959j4.pdf [file d3fo02959j4.pdf]

## Appendix 2

Quality assessment of included studies via Jadad scale.

| Study             | random sequence generation | allocation concealment | Double-blindness | Dropout and reasons | Total score | Quality |
|-------------------|----------------------------|------------------------|------------------|---------------------|-------------|---------|
| Freund-Levi, 2006 | 1                          | 1                      | 2                | 1                   | 5           | high    |
| Chiu, 2008        | 1                          | 2                      | 2                | 1                   | 6           | high    |
| Yurko-Mauro, 2010 | 2                          | 2                      | 2                | 1                   | 7           | high    |
| Quinn, 2010       | 2                          | 2                      | 2                | 1                   | 7           | high    |
| Geleijnse, 2012   | 1                          | 1                      | 2                | 1                   | 5           | high    |
| Lee, 2012         | 2                          | 2                      | 2                | 1                   | 7           | high    |
| Shinto, 2014      | 2                          | 2                      | 1                | 1                   | 6           | high    |
| Mahmoudi, 2014    | 2                          | 2                      | 2                | 1                   | 7           | high    |
| Phillips, 2015    | 1                          | 1                      | 2                | 1                   | 5           | high    |
| Hashimoto, 2016   | 1                          | 1                      | 2                | 1                   | 5           | high    |
| HOOPER, 2017      | 2                          | 2                      | 2                | 0                   | 6           | high    |
| Andrieu, 2017     | 2                          | 2                      | 2                | 1                   | 7           | high    |
| Ichinose, 2020    | 1                          | 2                      | 2                | 1                   | 6           | high    |
| Ichinose, 2021    | 1                          | 1                      | 2                | 0                   | 4           | high    |
| Lin, 2022         | 1                          | 1                      | 2                | 0                   | 4           | high    |
